# Supplementary material
Source: PubMed Central journal article supplement (PMC3929589)

## Supplemental Figure S2

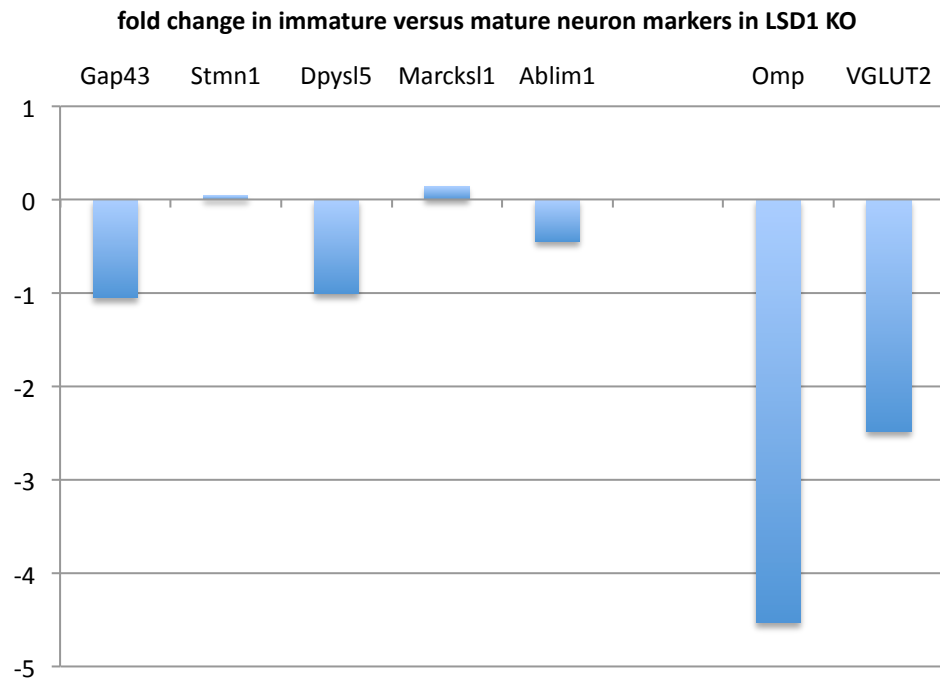

Supplement: NIHMS536895-supplement-Supplemental_Figure_S2.pdf [file NIHMS536895-supplement-Supplemental_Figure_S2.pdf]

Supplemental Figure S3

Foxg1-Cre/+; Lsd1 flox/flox; Gng8-tTA; Omp-tTA;  
tetO-MOR28-tau::*lacZ*

Whole mount

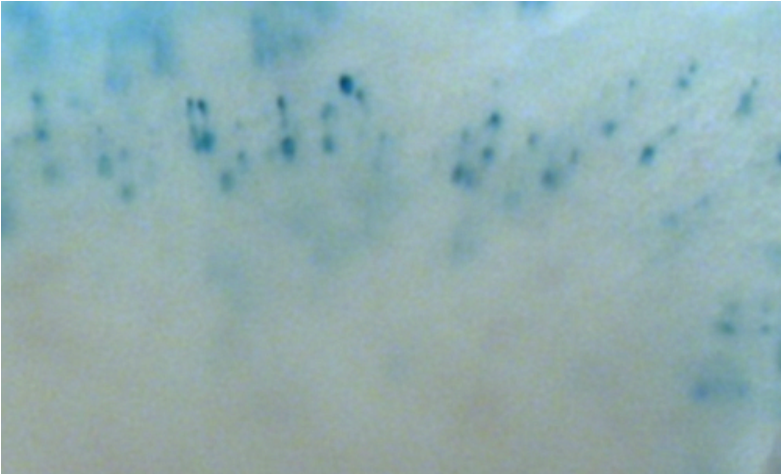

Supplement: NIHMS536895-supplement-Supplemental_Figure_S3.pdf [file NIHMS536895-supplement-Supplemental_Figure_S3.pdf]

Supplemental Figure S4

**A**

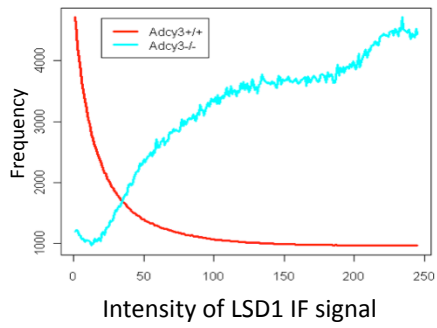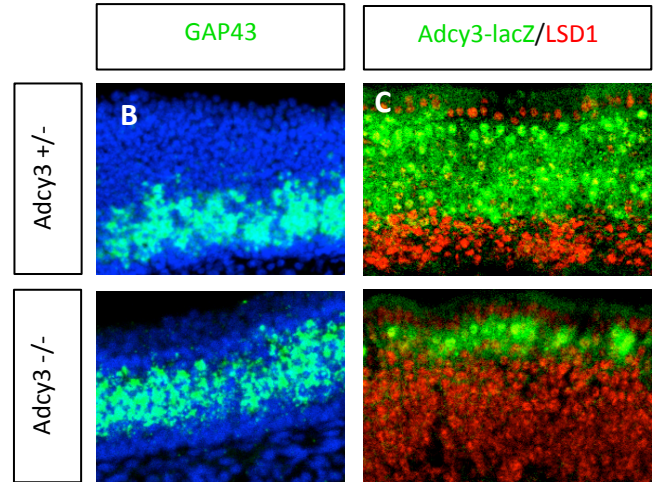

**D** percentage total OR reads mapping to pseudogenes

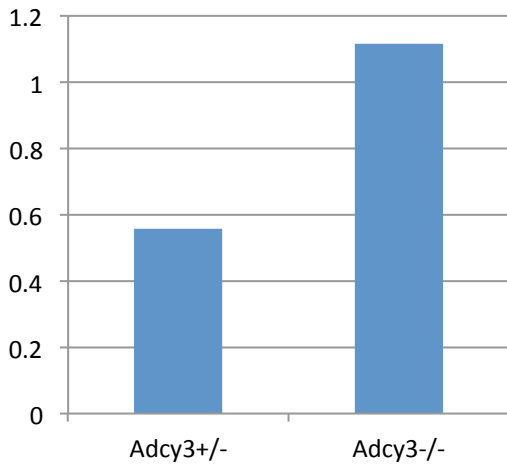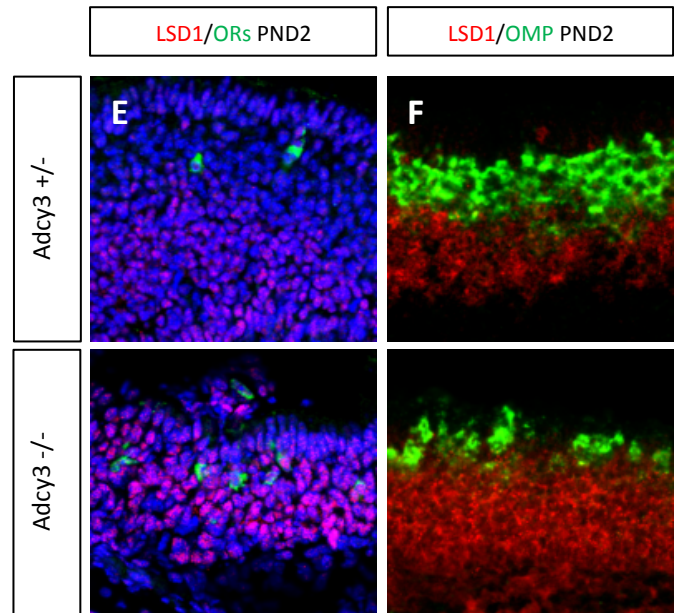

Supplement: NIHMS536895-supplement-Supplemental_Figure_S4.pdf [file NIHMS536895-supplement-Supplemental_Figure_S4.pdf]

Supplemental Figure S5

A

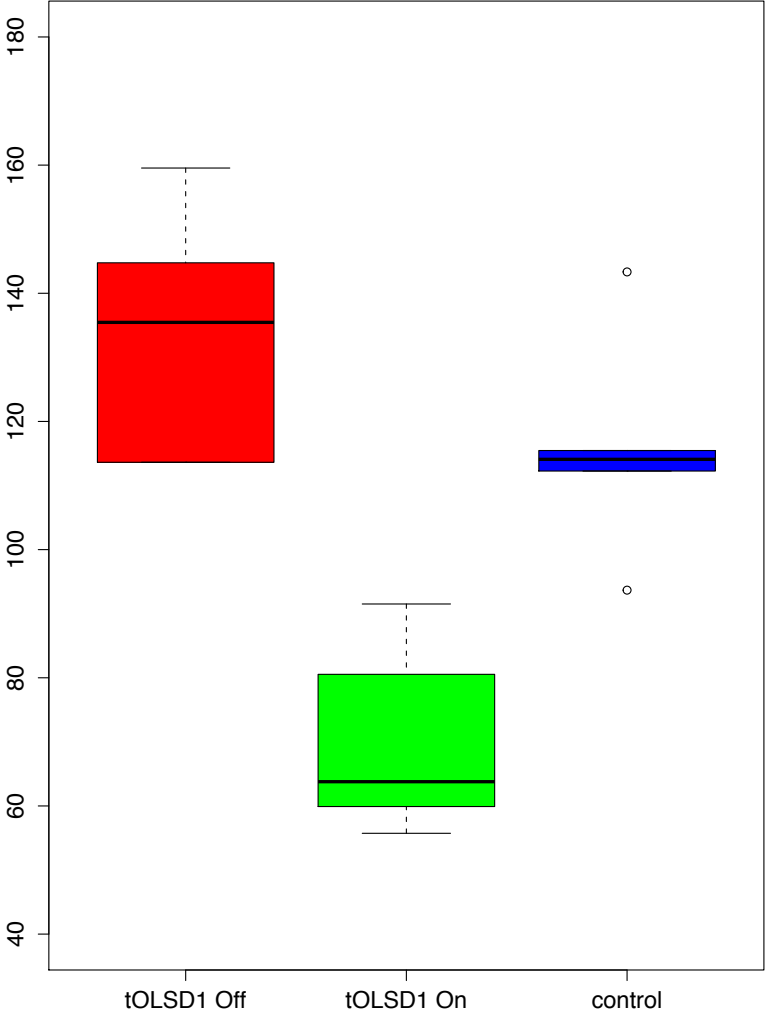

Supplement: NIHMS536895-supplement-Supplemental_Figure_S5.pdf [file NIHMS536895-supplement-Supplemental_Figure_S5.pdf]

# Supplemental Figure S6

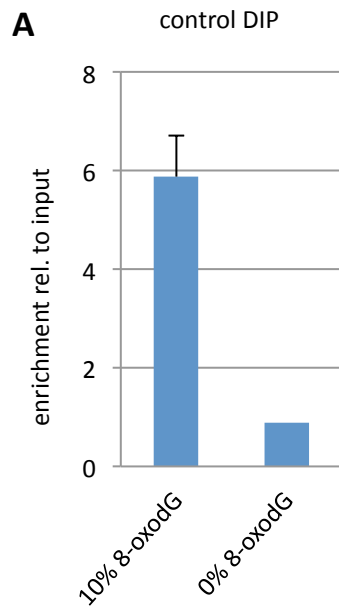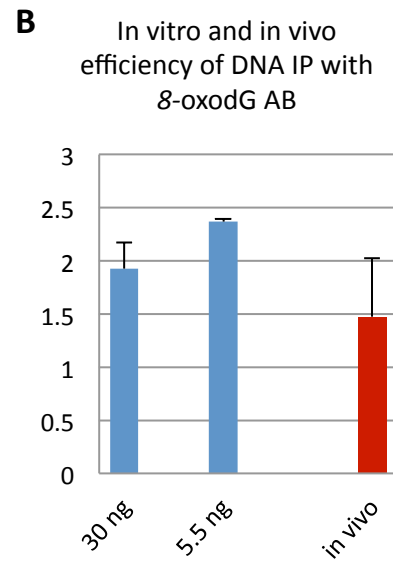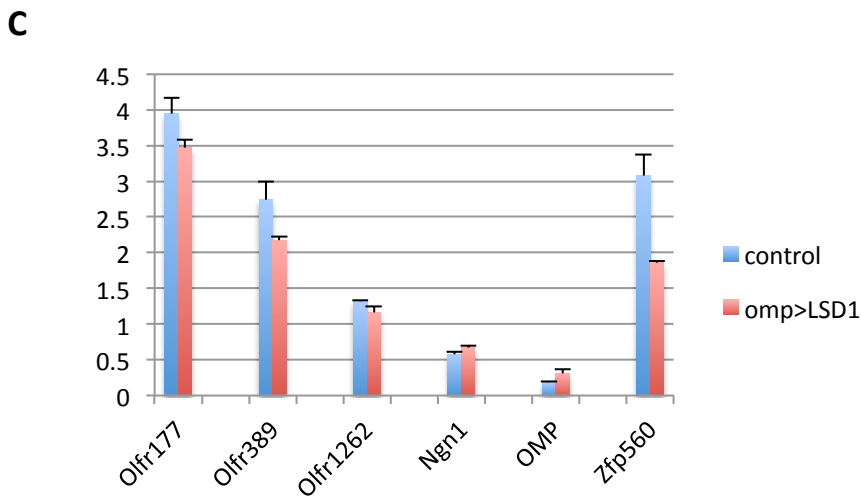

Supplement: NIHMS536895-supplement-Supplemental_Figure_S6.pdf [file NIHMS536895-supplement-Supplemental_Figure_S6.pdf]

# Supplemental Figure S1

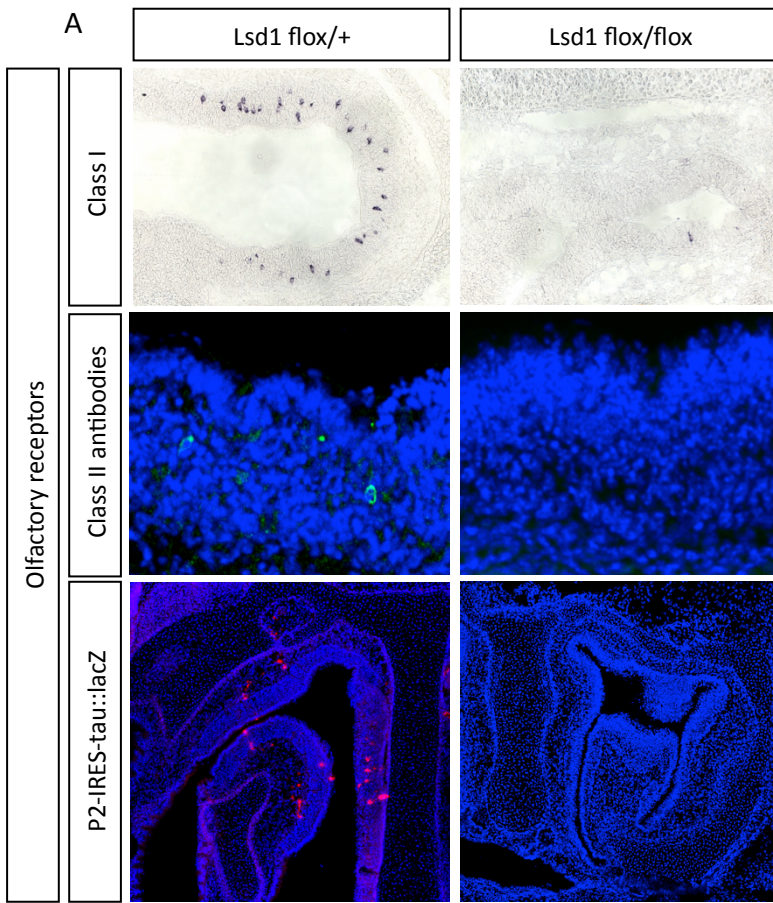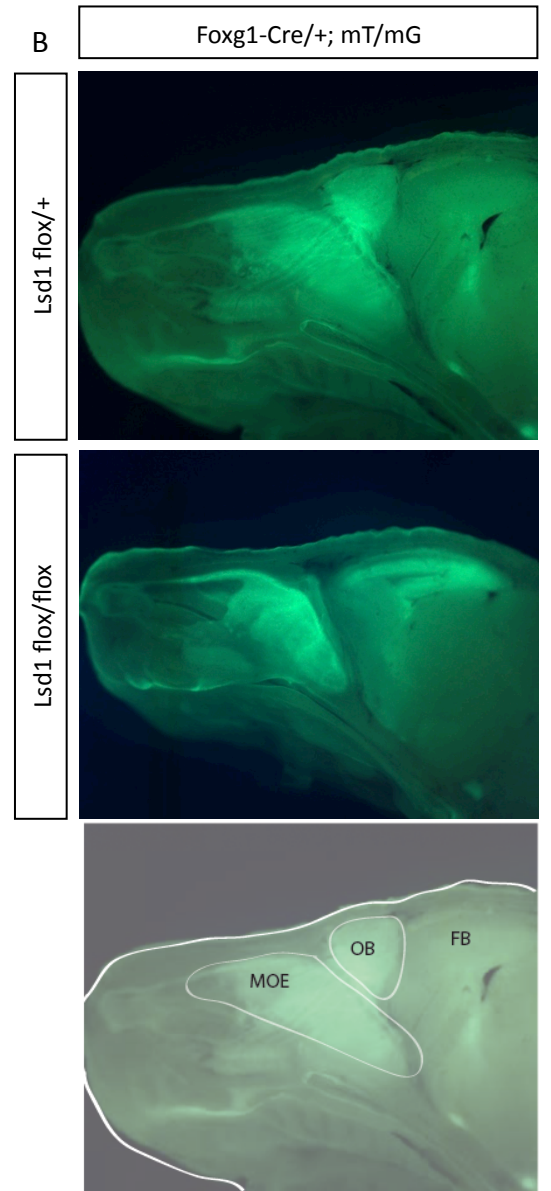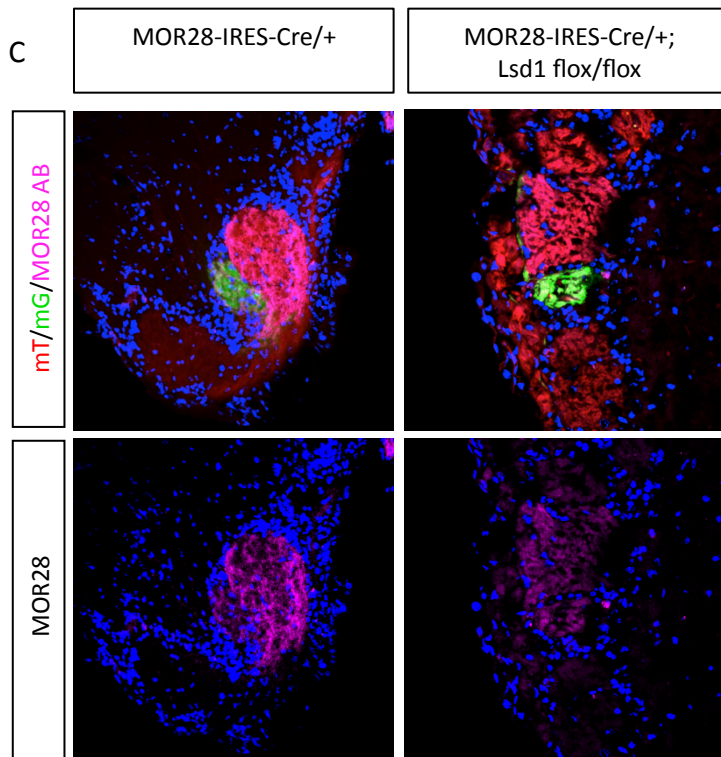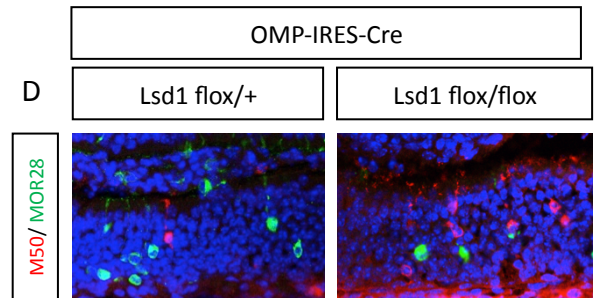

Supplement: NIHMS536895-supplement-supplemental_Figure_1.pdf [file NIHMS536895-supplement-supplemental_Figure_1.pdf]
